# Supplementary material for: A Brønsted acidic ionic liquid anchored to magnetite nanoparticles as a novel recoverable heterogeneous catalyst for the Biginelli reaction
Source: Royal Society of Chemistry journal article supplement (doi:10.1039/d0ra09929e), 2021-01-01

## SUPPORTING INFORMATION

# Brønsted acidic ionic liquid anchored on magnetite nanoparticles as a novel recoverable heterogeneous catalyst in the Biginelli reaction

Hourieh Sadat Oboudatian, Hossein Naeimi, Mohsen Moradian\*

Department of Organic Chemistry, Faculty of Chemistry, University of Kashan, Kashan, I.R. Iran

### Table of Contents

#### Details of Experimental Section

|                                                                                                                                 |    |
|---------------------------------------------------------------------------------------------------------------------------------|----|
| 2. The details for the synthesis of compound 4a-4o.....                                                                         | S3 |
| 2.3. General procedure for the synthesis of 3,4-Dihydropyrimidinones .....                                                      | S3 |
| Scheme 1. of Preparation of 3,4-dihydropyrimidinones by $\text{Fe}_3\text{O}_4@\text{SiO}_2/\text{TES-Mo}^+\text{HSO}_4^-$ .... | S4 |
| The FT-IR spectra of compound 4a.....                                                                                           | S4 |
| The $^1\text{H}$ NMR spectra of 4a.....                                                                                         | S4 |
| The FT-IR spectra of compound 4b.....                                                                                           | S5 |
| The $^1\text{H}$ NMR spectra of 4b.....                                                                                         | S5 |
| The FT-IR spectra of compound 4c.....                                                                                           | S6 |
| The $^1\text{H}$ NMR spectrum of 4c.....                                                                                        | S6 |
| The FT-IR spectra of compound 4d.....                                                                                           | S7 |
| The $^1\text{H}$ NMR spectrum of 4d.....                                                                                        | S7 |
| The FT-IR spectra of compound 4e.....                                                                                           | S8 |

|                                                                                                                           |     |
|---------------------------------------------------------------------------------------------------------------------------|-----|
| The <sup>1</sup> H NMR spectrum of <b>4e</b> .....                                                                        | S8  |
| The FT-IR spectra of compound <b>4f</b> .....                                                                             | S9  |
| The <sup>1</sup> H NMR spectrum of <b>4f</b> .....                                                                        | S9  |
| The FT-IR spectra of compound <b>4g</b> .....                                                                             | S10 |
| The <sup>1</sup> H NMR spectrum of <b>4g</b> .....                                                                        | S10 |
| The FT-IR spectra of compound <b>4h</b> .....                                                                             | S11 |
| The <sup>1</sup> H NMR spectrum of <b>4h</b> .....                                                                        | S11 |
| The FT-IR spectra of compound <b>4i</b> .....                                                                             | S12 |
| The <sup>1</sup> H NMR spectrum of <b>4i</b> .....                                                                        | S12 |
| The FT-IR spectra of compound <b>4j</b> .....                                                                             | S13 |
| The <sup>1</sup> H NMR spectrum of <b>4j</b> .....                                                                        | S13 |
| The FT-IR spectra of compound <b>4k</b> .....                                                                             | S14 |
| The <sup>1</sup> H NMR spectrum of <b>4k</b> .....                                                                        | S14 |
| The FT-IR spectra of compound <b>4l</b> .....                                                                             | S15 |
| The <sup>1</sup> H NMR spectrum of <b>4l</b> .....                                                                        | S15 |
| The <sup>1</sup> H NMR spectra of <b>4l</b> in DMSO-D <sub>6</sub> and D <sub>2</sub> O as NMR solvent.....               | S16 |
| The FT-IR spectra of compound <b>4m</b> .....                                                                             | S17 |
| The <sup>1</sup> H NMR spectrum of <b>4m</b> .....                                                                        | S17 |
| The FT-IR spectra of compound <b>4n</b> .....                                                                             | S18 |
| The <sup>1</sup> H NMR spectrum of <b>4n</b> .....                                                                        | S18 |
| The <sup>1</sup> H NMR spectra of <b>4n</b> in CHCl <sub>3</sub> -D <sub>6</sub> and D <sub>2</sub> O as NMR solvent..... | S19 |
| The FT-IR spectra of compound <b>4o</b> .....                                                                             | S20 |
| The <sup>1</sup> H NMR spectrum of <b>4o</b> .....                                                                        | S20 |

### The FT-IR spectra of compound 4a

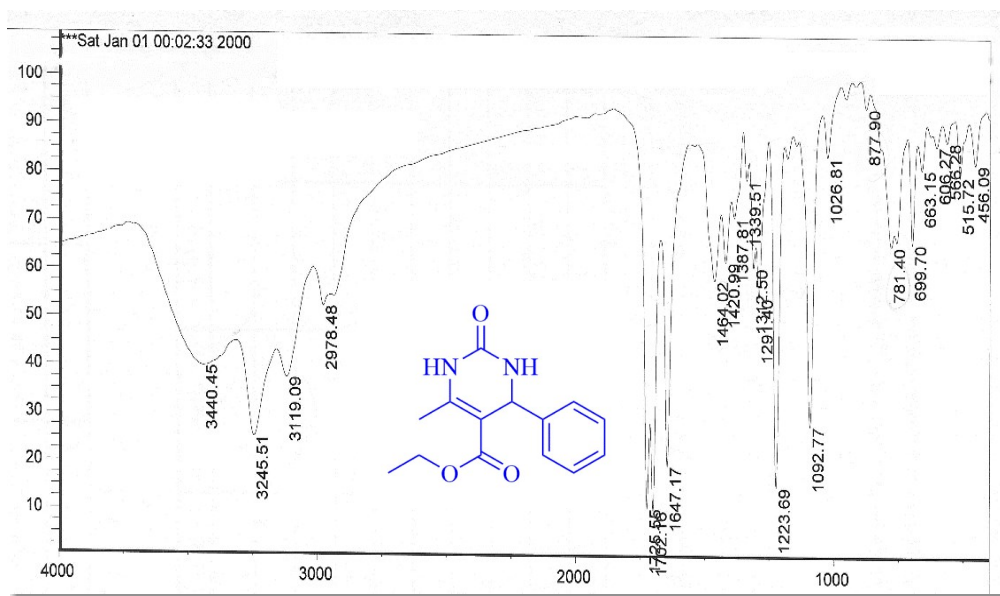

### The <sup>1</sup>H NMR spectrum of 4a

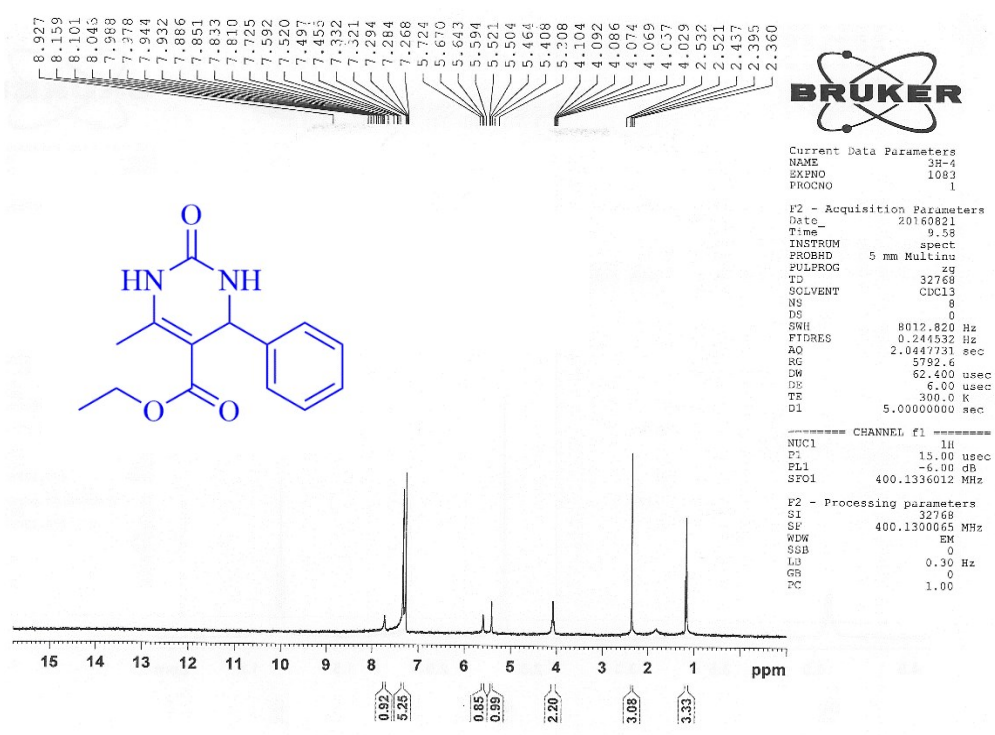

### The FT-IR spectra of compound **4b**

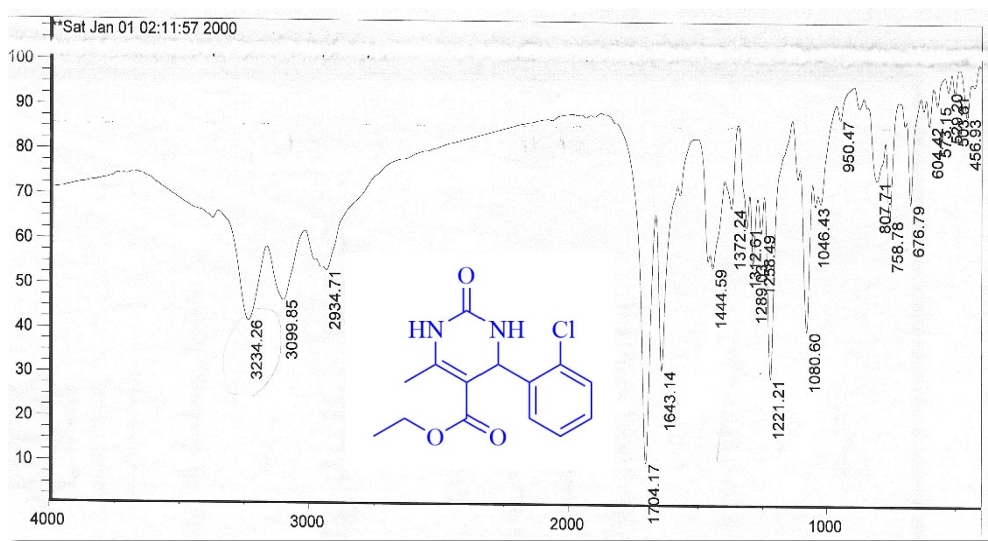

### The <sup>1</sup>H NMR spectrum of **4b**

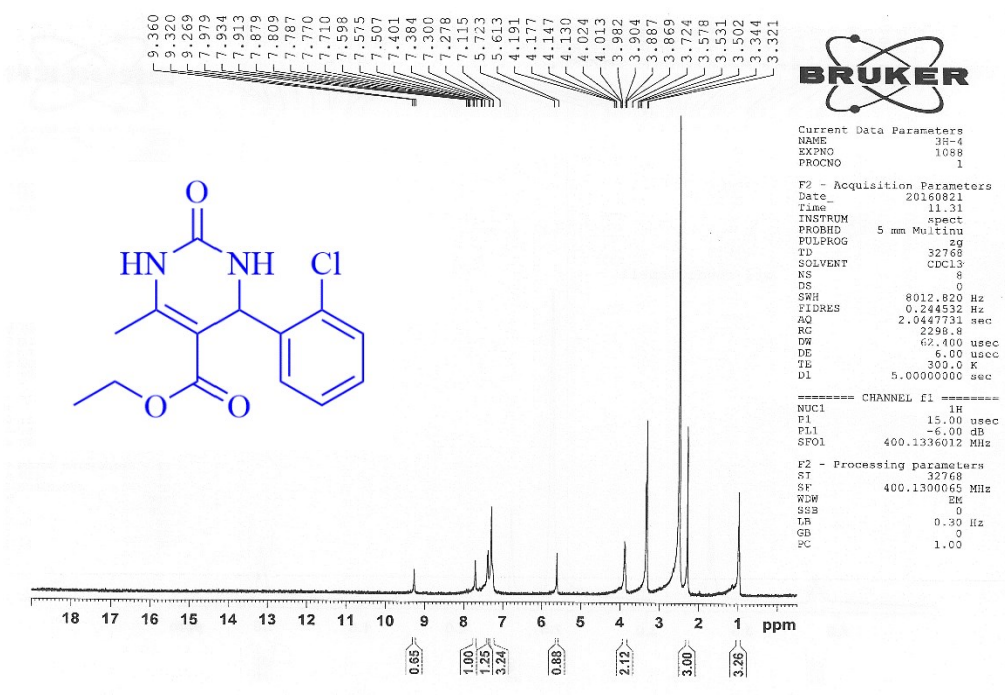

### The FT-IR spectra of compound 4c

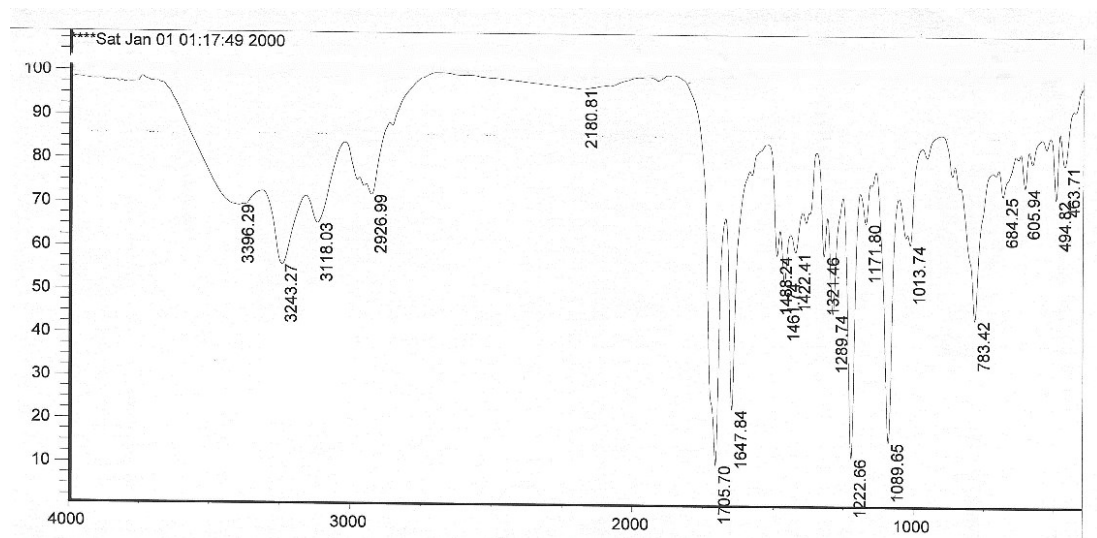

### The <sup>1</sup>H NMR spectrum of 4c

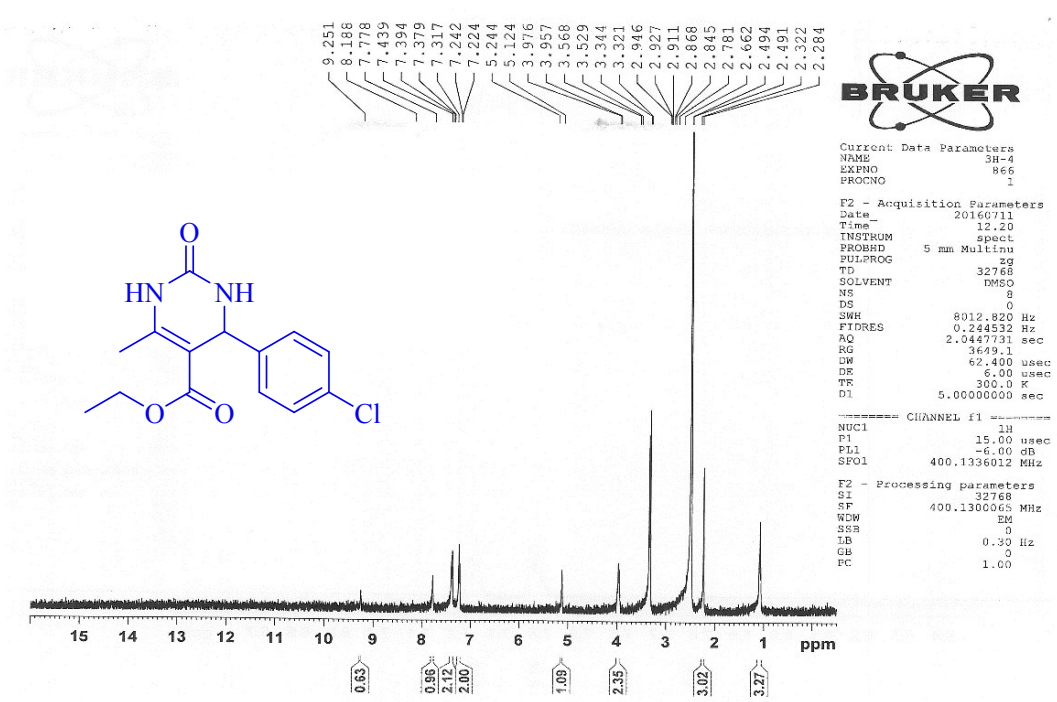

### The FT-IR spectra of compound 4d

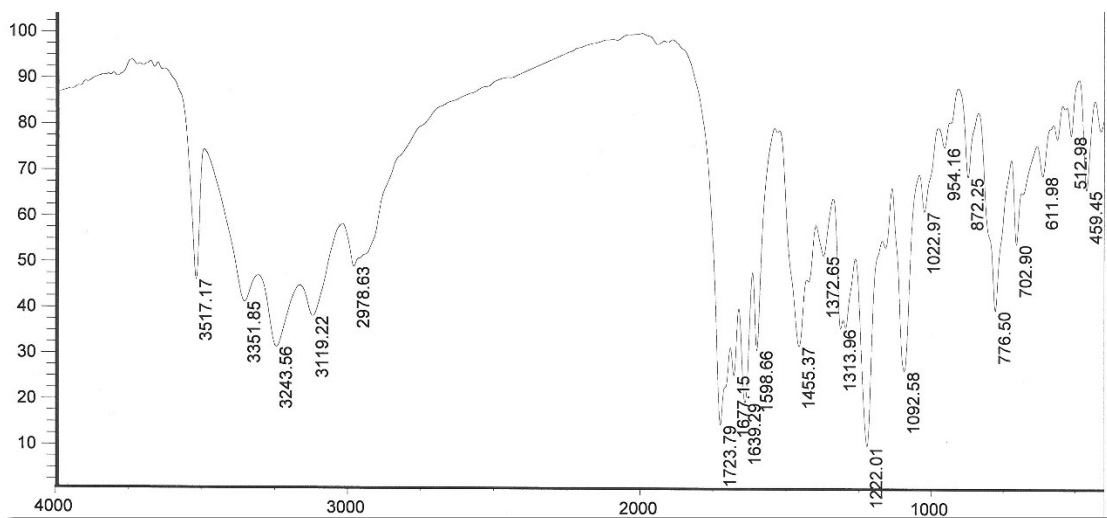

### The <sup>1</sup>H NMR spectrum of 4d

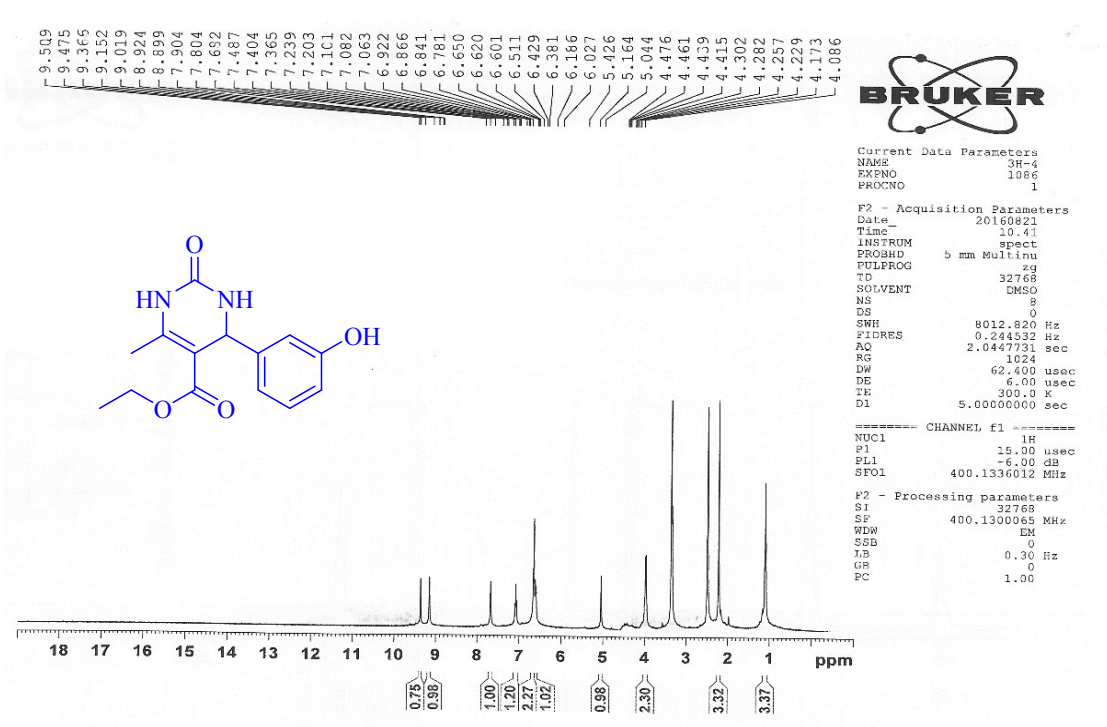

### The FT-IR spectra of compound 4e

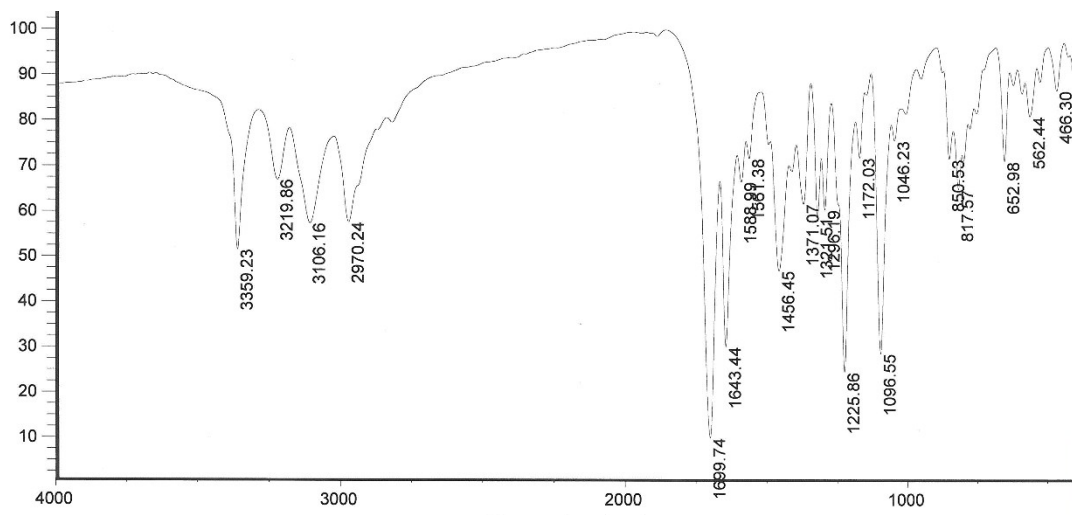

The  $^1\text{H}$  NMR spectrum of 4e

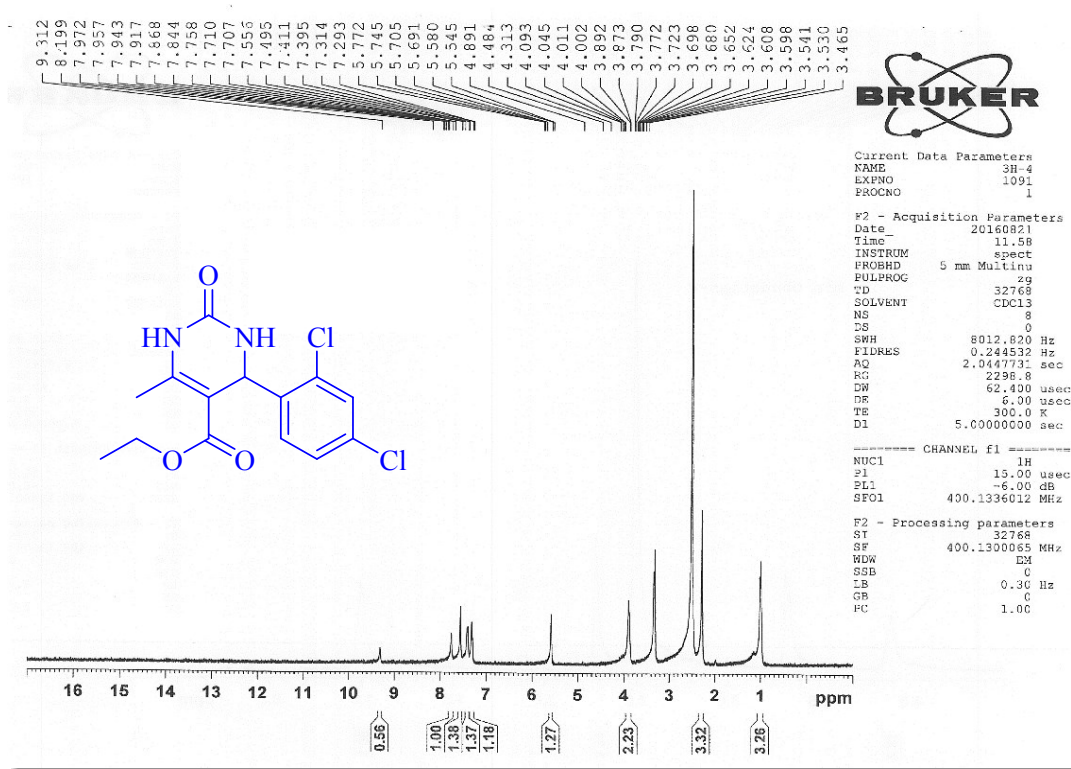

The FT-IR spectra of compound **4f**

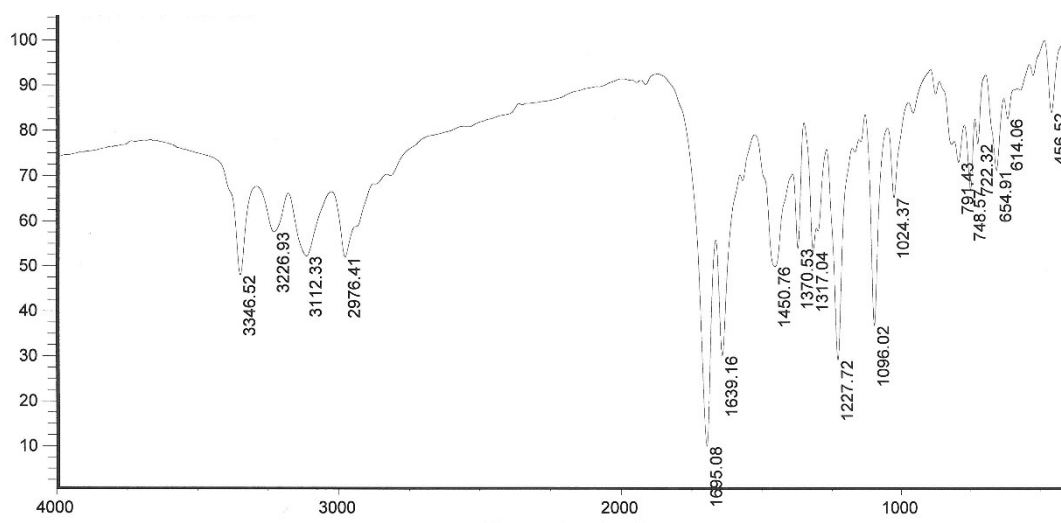

The <sup>1</sup>H NMR spectrum of **4f**

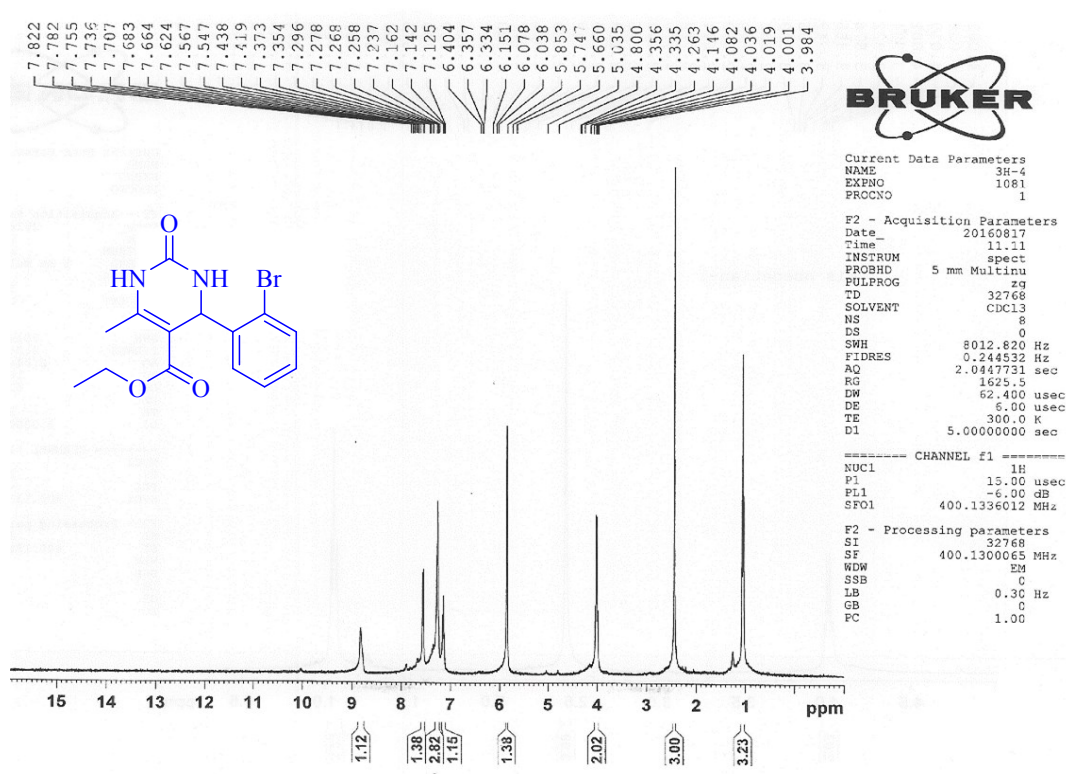

The FT-IR spectra of compound **4g**



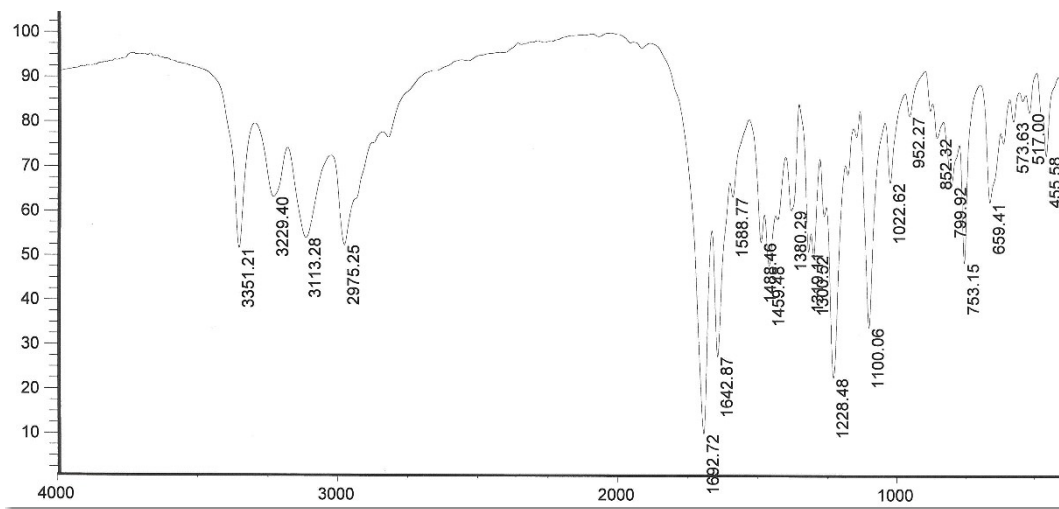

The <sup>1</sup>H NMR spectrum of 4g

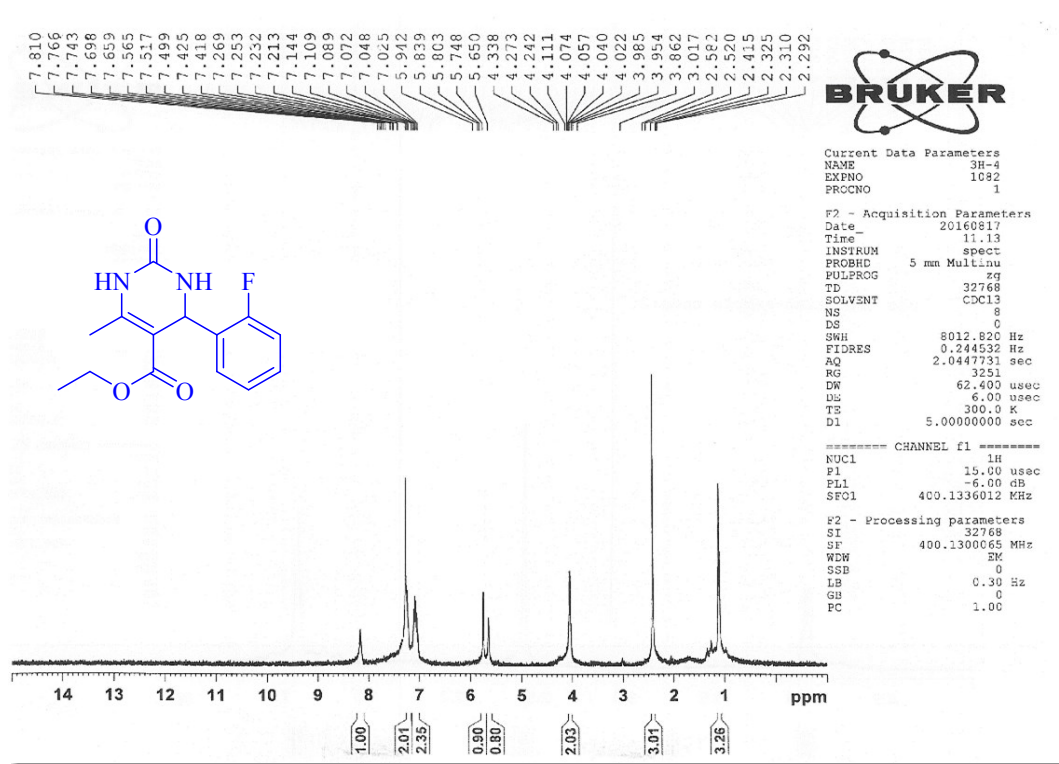

The FT-IR spectra of compound 4h

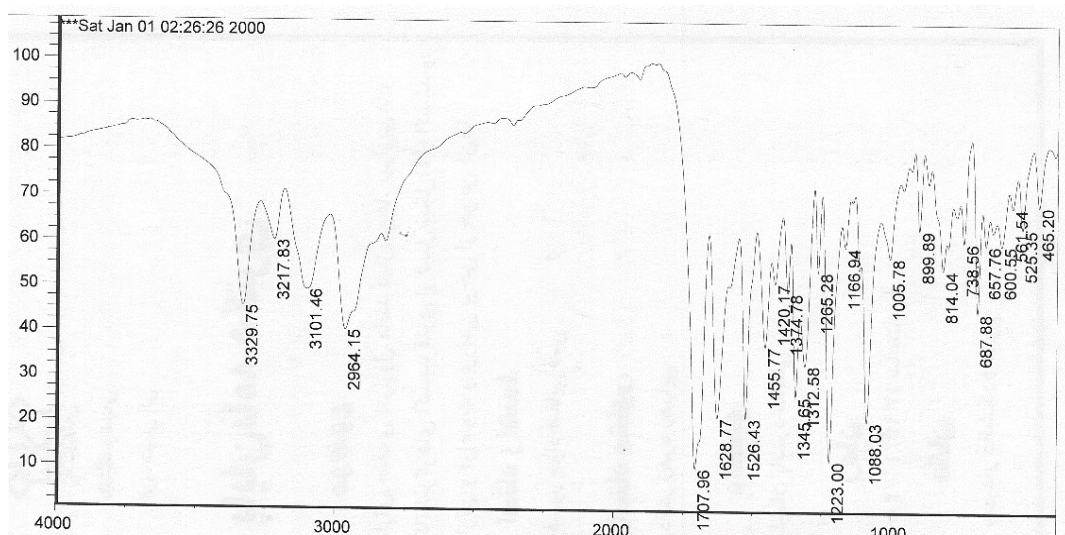

The  $^1\text{H}$  NMR spectrum of **4h**

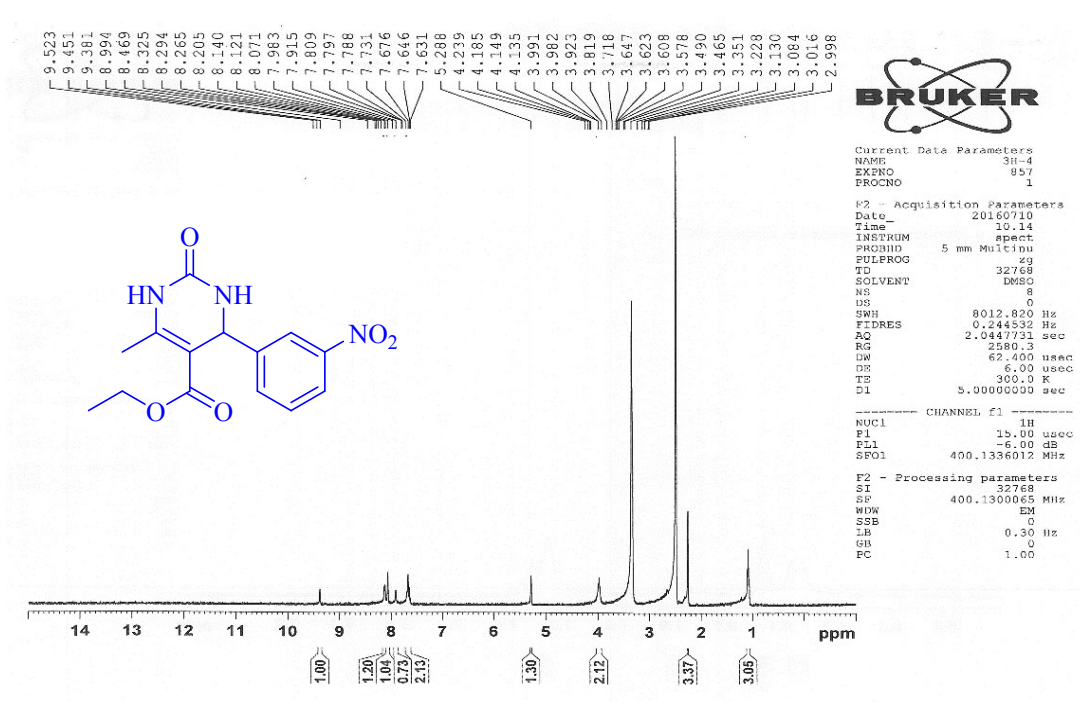

The FT-IR spectra of compound **4i**

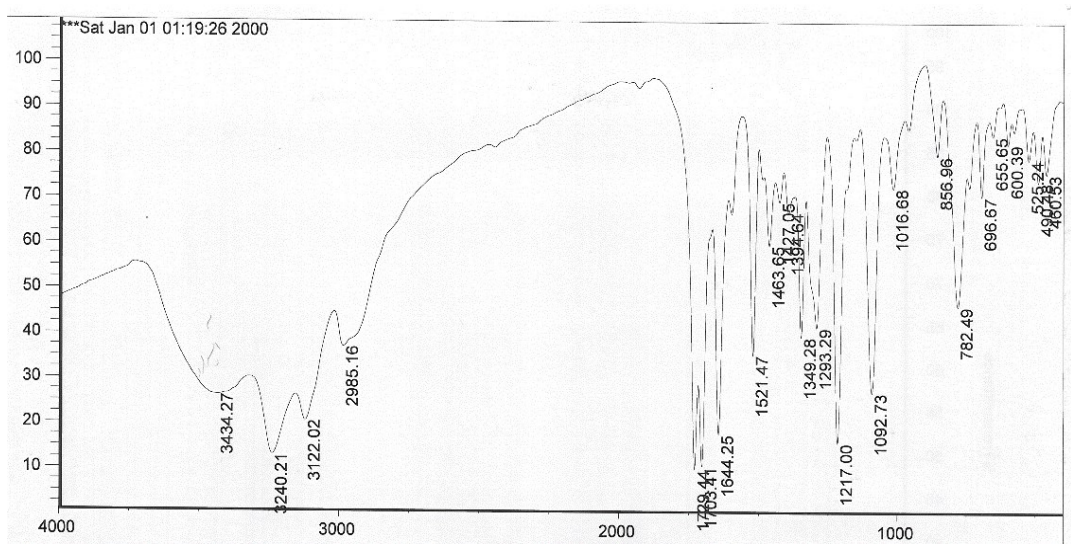

The <sup>1</sup>H NMR spectrum of **4i**

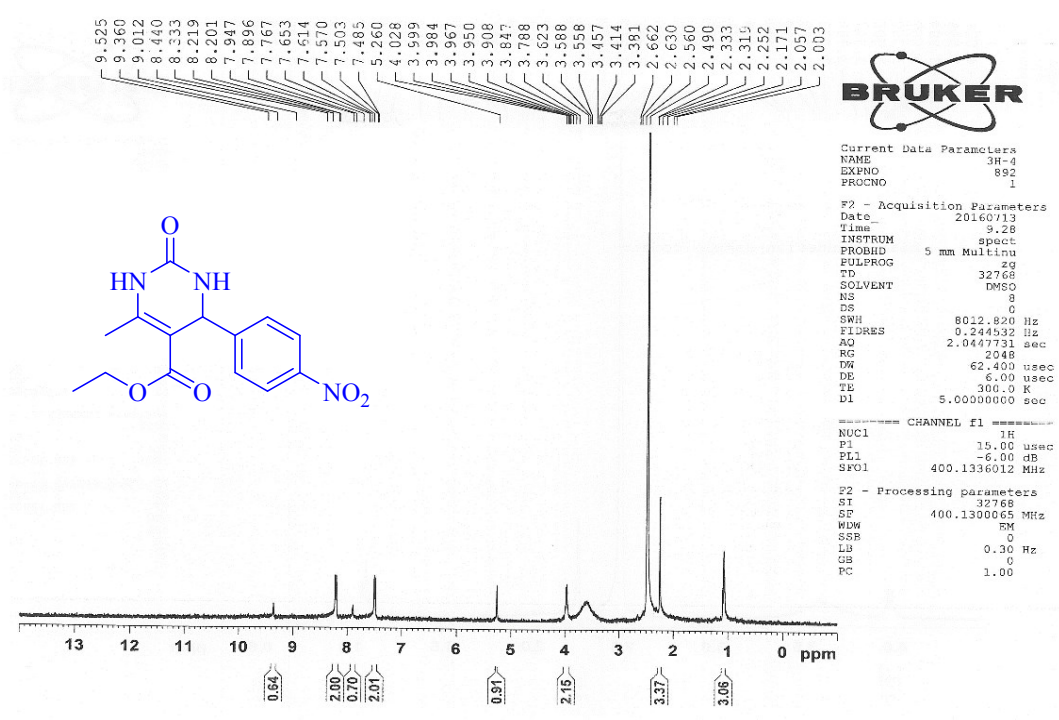

The FT-IR spectra of compound **4j**

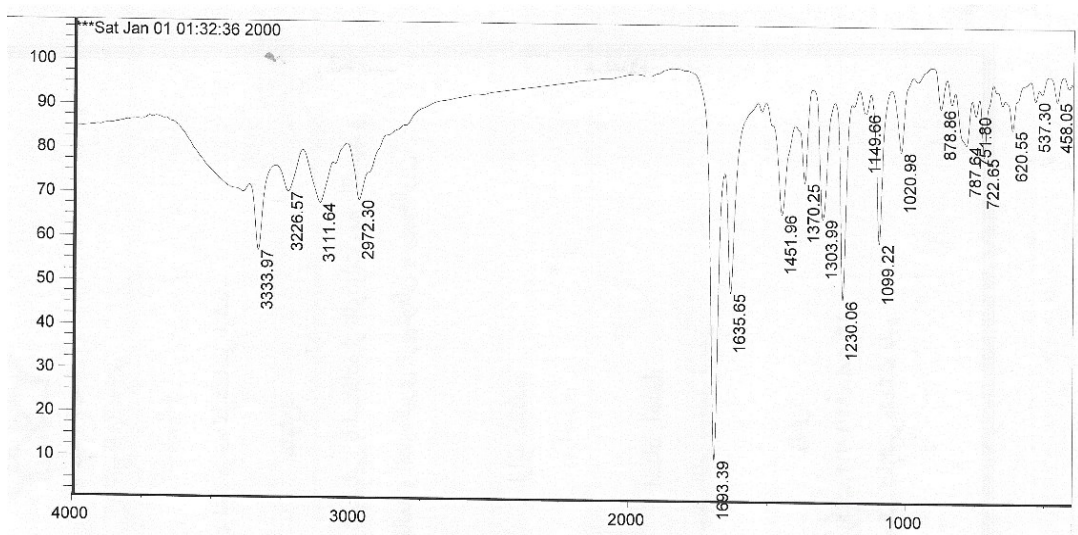

The  $^1\text{H}$  NMR spectrum of **4j**

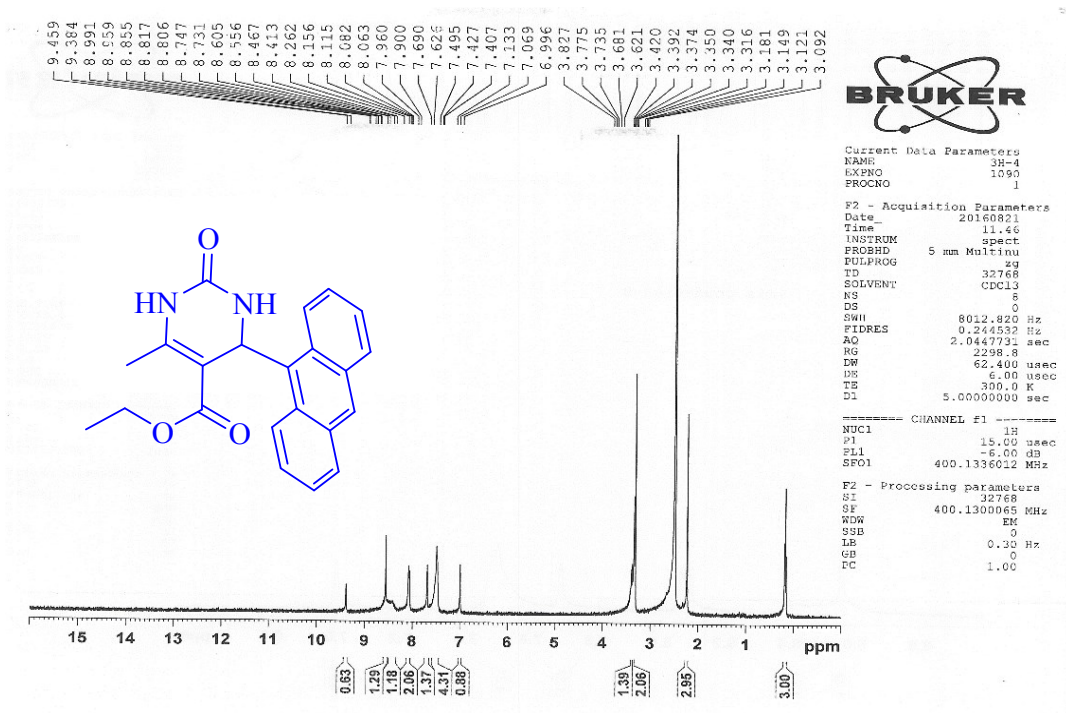

The FT-IR spectra of compound **4k**

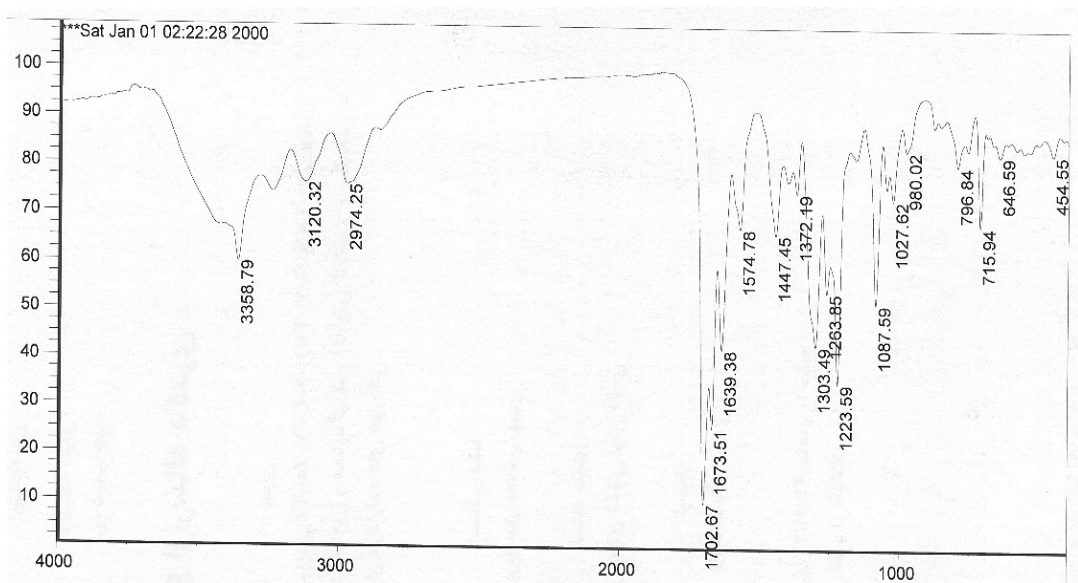

The  $^1\text{H}$  NMR spectrum of 4k

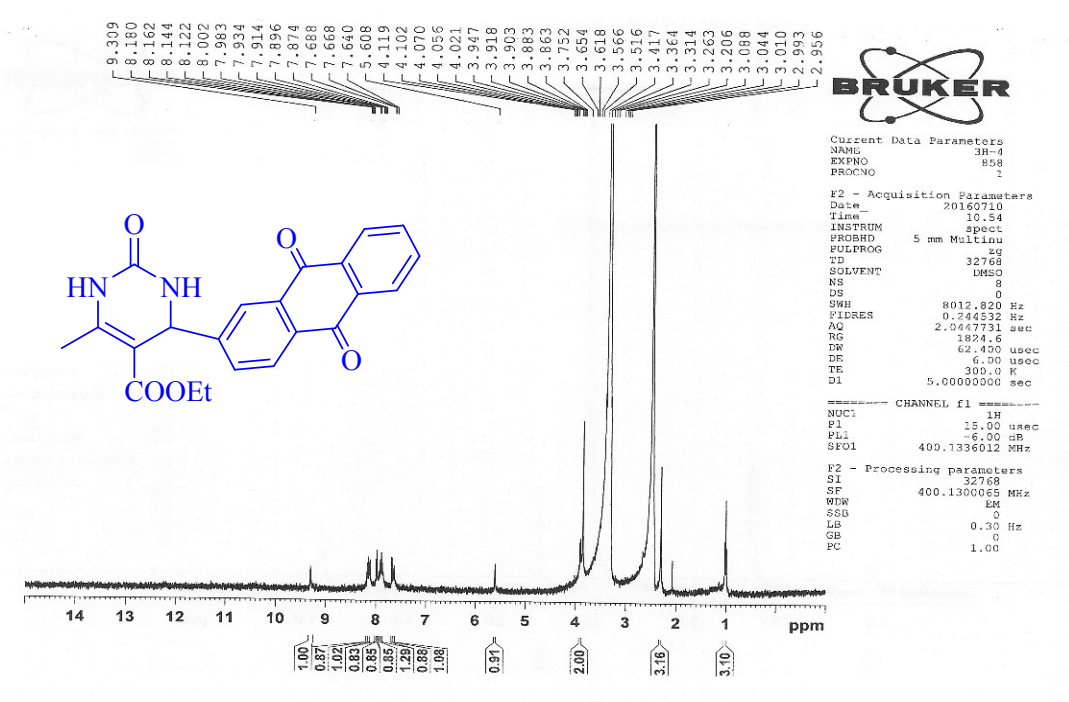

The FT-IR spectra of compound 4l

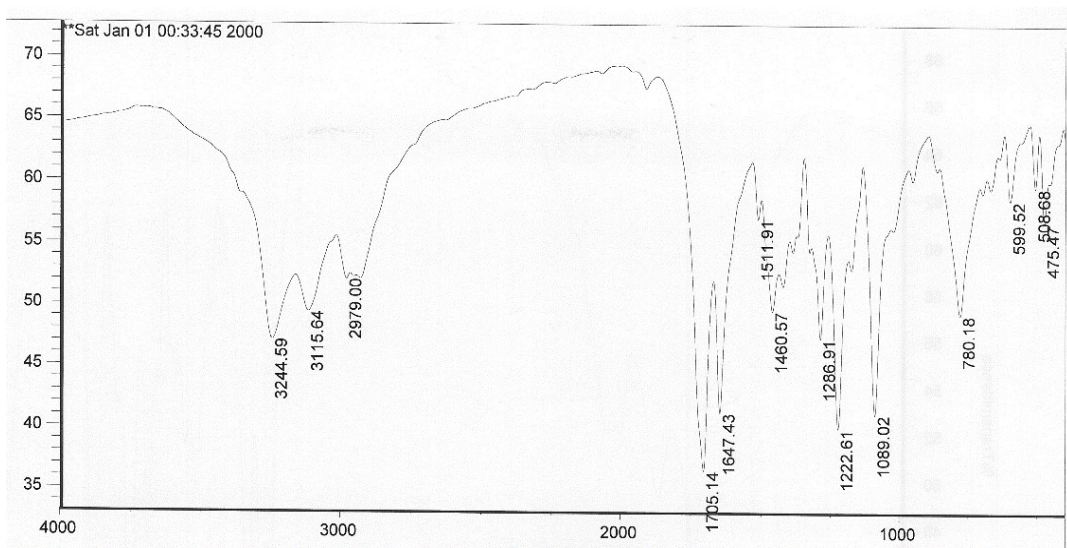

The  $^1\text{H}$  NMR spectrum of **4I**

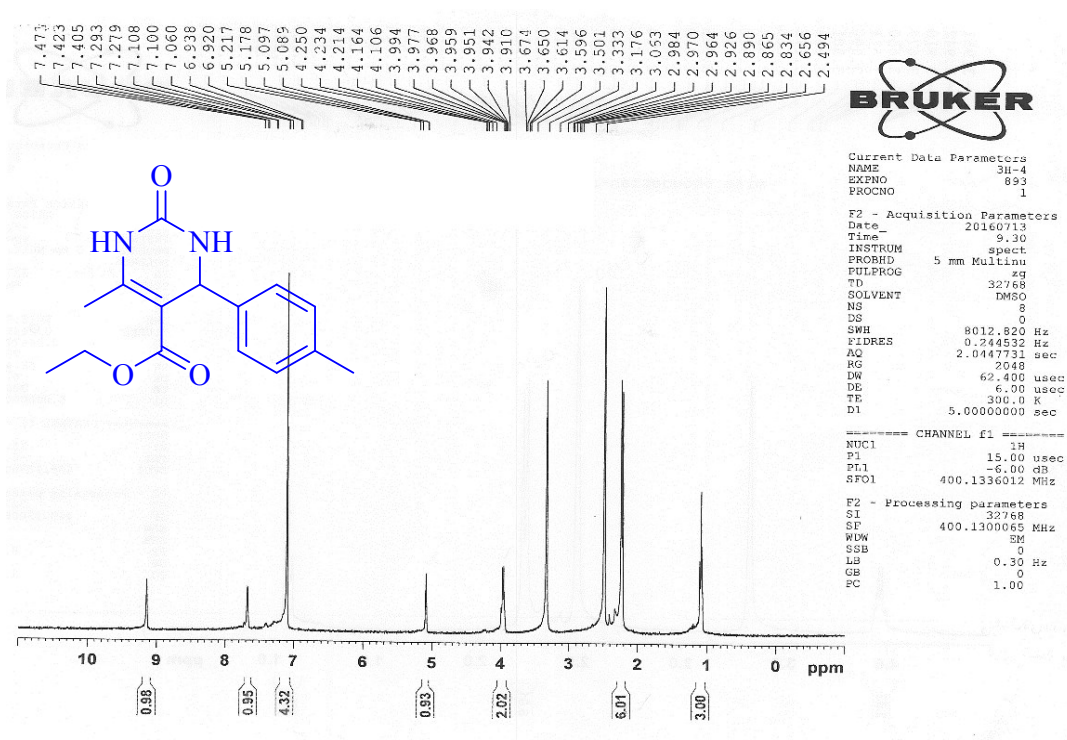

The  $^1\text{H}$  NMR spectra of **4I** in  $\text{DMSO-D}_6$  and  $\text{D}_2\text{O}$  as NMR solvent

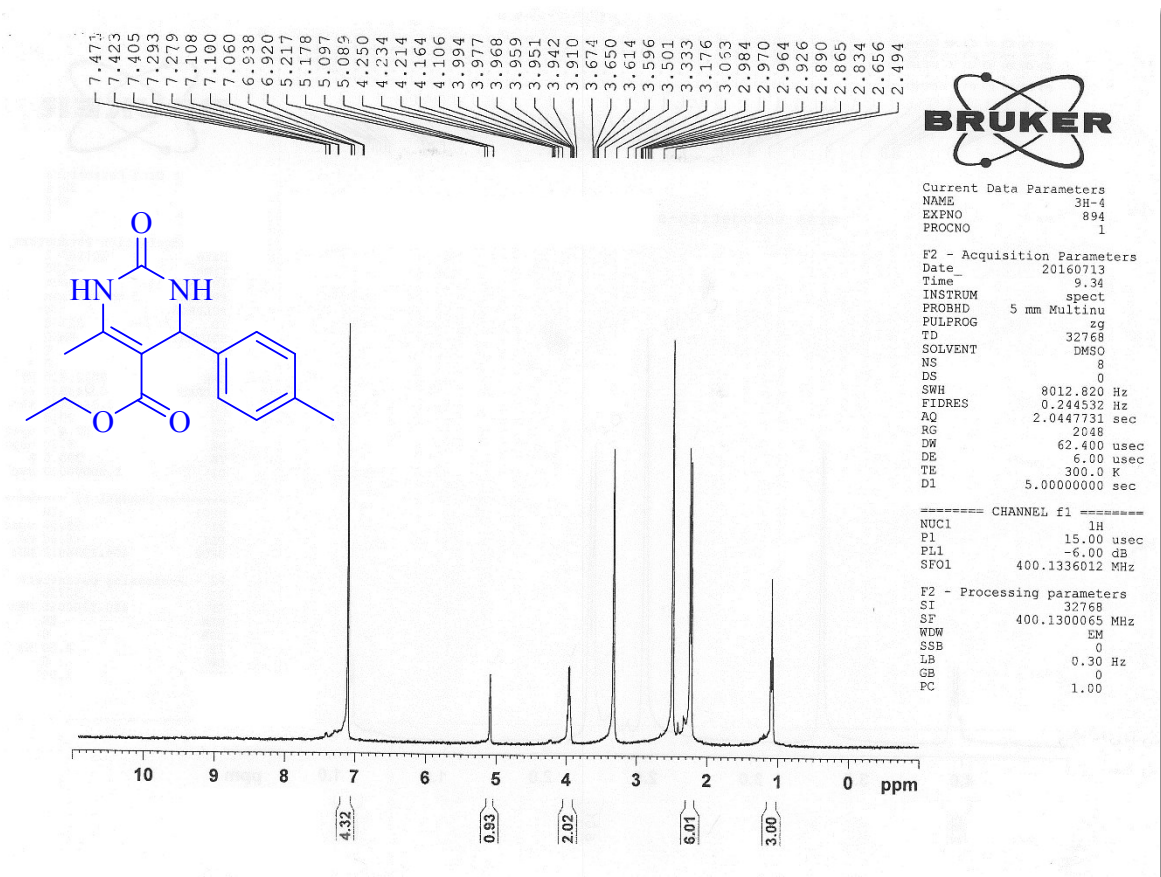

The FT-IR spectra of compound **4m**

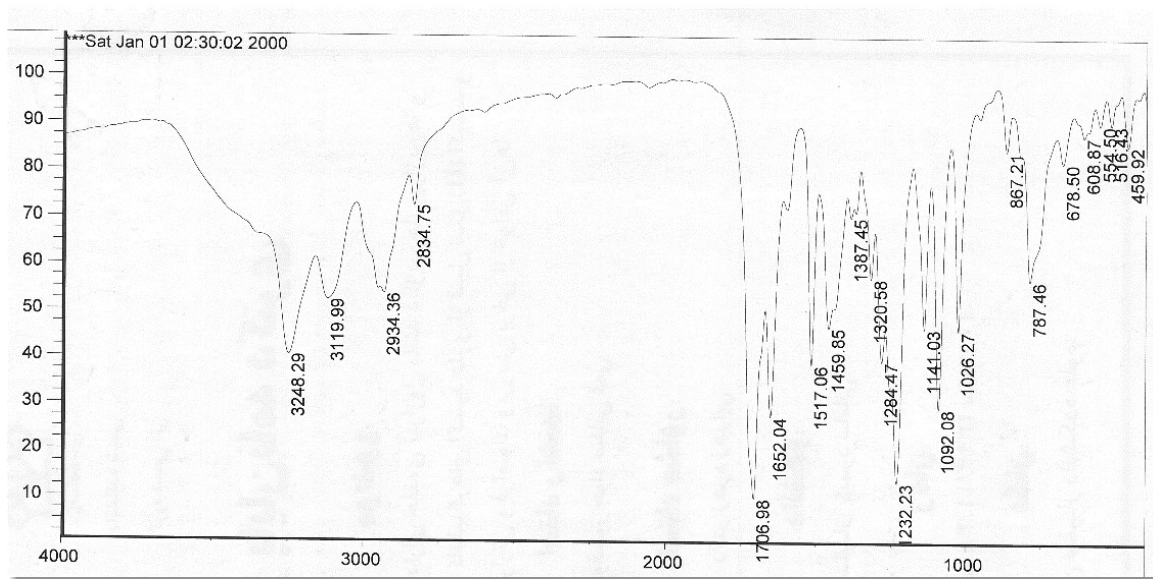

The <sup>1</sup>H NMR spectrum of **4m**

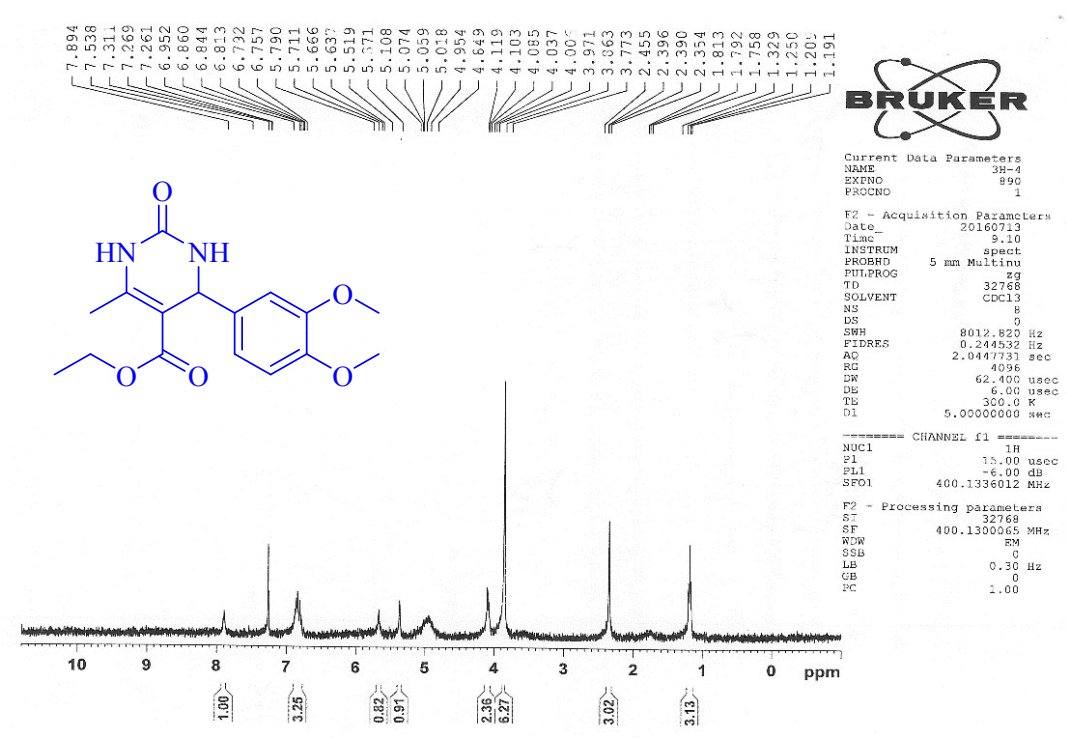

The FT-IR spectra of compound **4n**

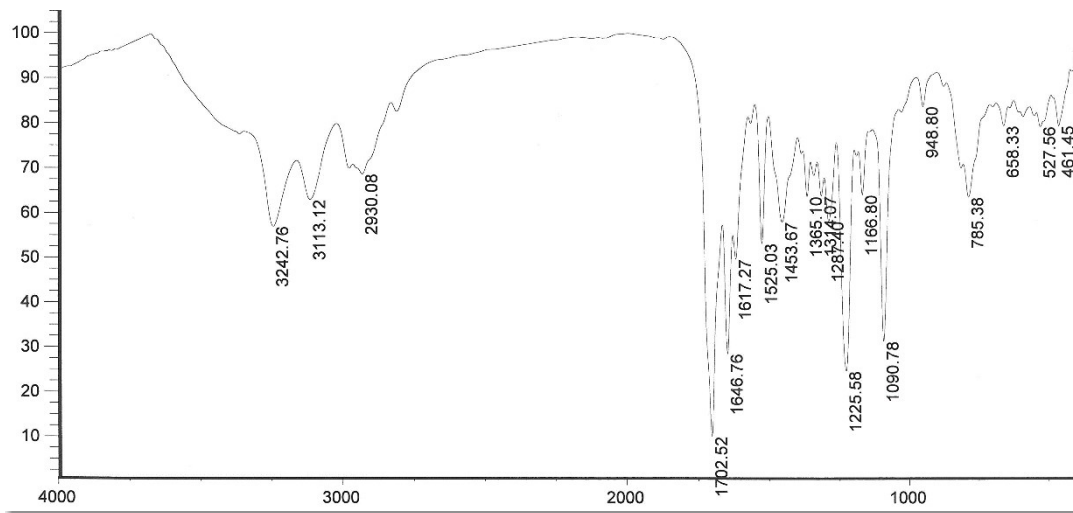

The <sup>1</sup>H NMR spectrum of **4n**



8.981  
8.040  
7.895  
7.568  
7.768  
7.723  
7.706  
7.680  
7.663  
7.579  
7.548  
7.504  
7.451  
7.402  
7.367  
7.346  
7.326  
7.302  
7.165  
7.141  
7.106  
7.086  
7.034  
7.013  
6.842  
6.652  
6.631  
6.555  
6.525  
6.451  
5.458  
5.119  
5.016  
4.797  
4.237  
4.176  
4.140  
4.043  
3.987  
3.970  
3.956  
3.940  
3.905

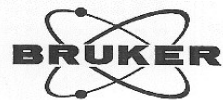

Current Data Parameters  
NAME 3H-4  
EXPNO 1089  
PROCNO 1

F2 - Acquisition Parameters  
Date\_ 20160821  
Time\_ 11.35  
INSTRUM spect  
PROBHD 5 mm Multinu  
PULPROG zg  
TD 32768  
SOLVENT CDCl3  
NS 8  
DS C  
SWH 8012.020 Hz  
FIDRES 0.244532 Hz  
AQ 2.0447731 sec  
RG 2298.8  
DW 62.400 usec  
DE 6.00 usec  
TE 300.0 K  
D1 5.00000000 sec

===== CHANNEL f1 =====  
NUC1 1H  
P1 15.00 usec  
PL1 -6.00 dB  
SFO1 400.1336012 MHz

F2 - Processing parameters  
SI 32768  
SF 400.1300665 MHz  
WDW FM  
SSB 0  
LB 0.30 Hz  
GB 0  
FC 1.00

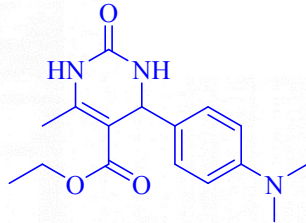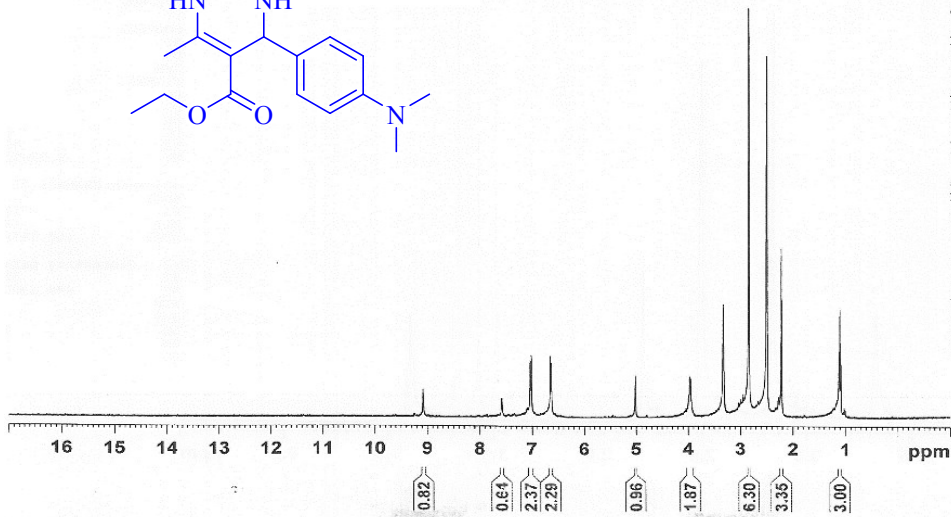

The  $^1\text{H}$  NMR spectra of **4n** in  $\text{CHCl}_3\text{-D}_6$  and  $\text{D}_2\text{O}$  as NMR solvent

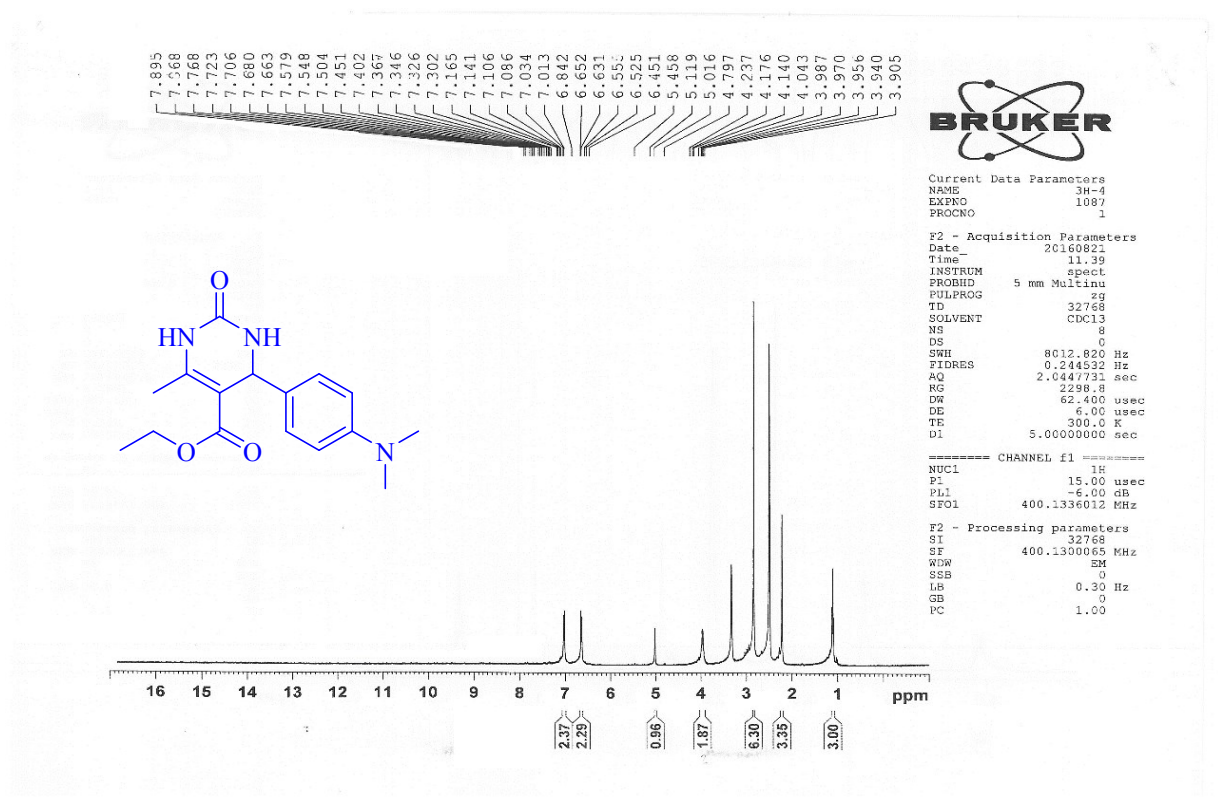

The FT-IR spectra of compound **4o**

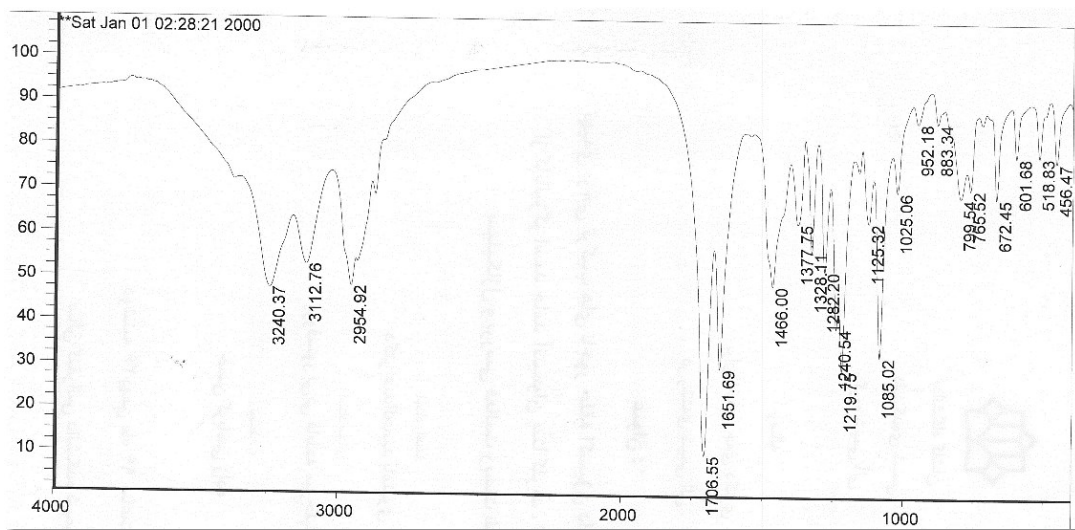

The  $^1\text{H}$  NMR spectrum of **4o**

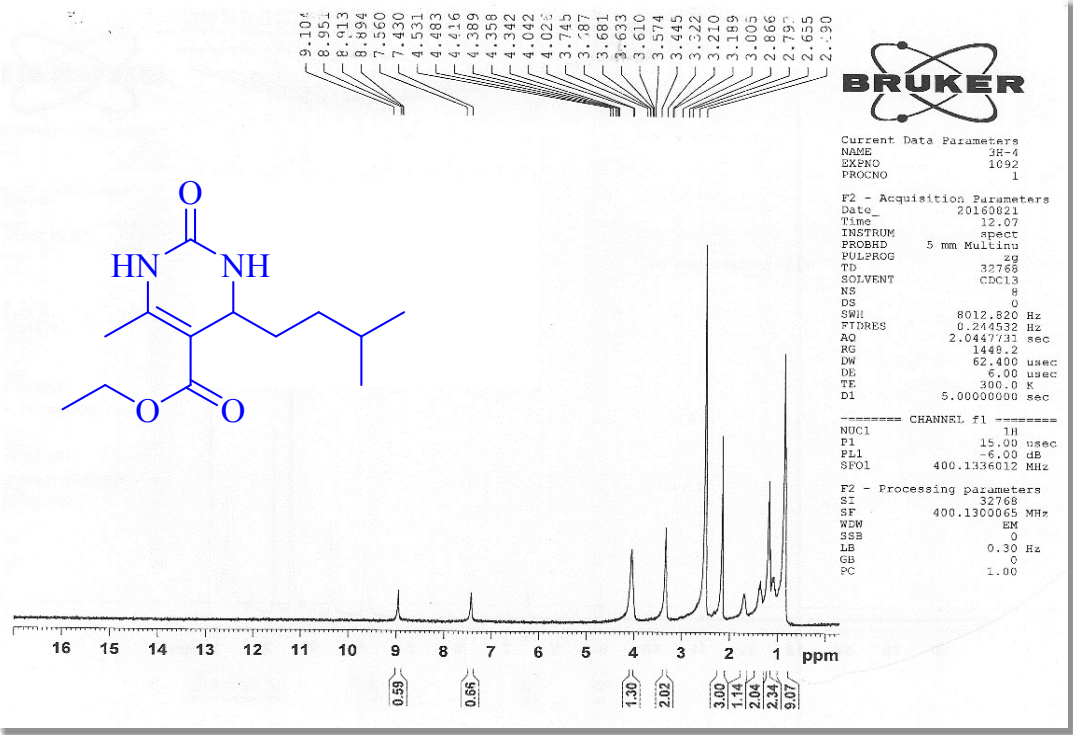

Supplement: d0ra09929e1.pdf [file d0ra09929e1.pdf]
